# Supplementary material for: Chronophin regulates active vitamin B6 levels and transcriptomic features of glioblastoma cell lines cultured under non-adherent, serum-free conditions
Source: BMC Cancer. 2018 May 3;18:524. doi: 10.1186/s12885-018-4440-4 (PMC5934884; doi:10.1186/s12885-018-4440-4)
Supplement: Supplementary file 1 — Table S1. Comprehensive molecular characterization of glioblastoma cell lines. Comprehensive molecular characterization of all cell lines used in this study based on RNA-Seq. This table contains the name of the cell lines, mutation and expression analysis for TP53, analysis of genomic deletion (based on real-time PCR) and expression for CDKN2A as well as expression data for several glioblastoma subtype-specific genes. (XLSX 12 kb) [file 12885_2018_4440_MOESM1_ESM.xlsx]

## Sheet: Tabelle1
Cell Line	Expression Subtype ***	CDKN2A expression (RPKM)	CDKN2A deletion **	MGMT expression (RPKM)	IDH1/2 ****	TP53 expression	SNP (p53 variant)	Clinical significance p53 mutation (ClinVar)	p53 mutation type	EGFR expression (RPKM)	PDGFRA expression (RPKM)	NF1 expression (RPKM)	CHI3L1 expression (RPKM)	MET expression (RPKM)
U251	Classical	0	Homozygous	0.01842	WT	15.0172	rs28934576	Pathogenic/Likely pathogenic	Missense	3.21455	10.6887	0.6518	0.01985	18.0726
A172	Classical	0	Homozygous	0	WT	55.9096	NA	NA	None	29.0979	0.04947	5.11983	0.39041	36.774
TP365	Mesenchymal	28.5213	Hemizygous	0	WT	25.8087	rs876660825	Uncertain significance	Missense	20.9844	28.5164	2.61164	0.37016	29.5431
T98G	Mesenchymal	0.13899	Homozygous	6.40146	WT	41.3492	rs587782664	Likely pathogenic/Uncertain significance	Missense	14.0286	6.75379	2.07569	0.12934	14.3498
U87	Mesenchymal	0.02245	Homozygous	0	WT	5.102	NA	NA	None	18.495	0.60822	2.53684	32.1721	61.7231
NCH1425	Classical	0.104	Homozygous	0	WT	37.2626	rs121912651	Pathogenic/Likely pathogenic	Missense	12.827	16.8875	4.04762	0.2823	11.675
NCH421k	Proneural	47.005	Hemizygous	0	WT	29.9044	rs730882025	Likely pathogenic/Uncertain significance	Missense	0.01269	1060.13	3.56503	0.16373	0.00794
NCH644	Proneural	62.7612	Hemizygous	4.46051	WT	46.8567	NA	NA	None	0.45462	0.79203	3.18401	0.30958	0.1502
NCH601	Classical	0.07883	Homozygous	0	WT	48.1426	NA	NA	None	1.92364	16.049	2.71329	0.92719	1.01736
NCH465	Classical	0	Homozygous	0	WT	26.7401	a*	Unknown	Missense	12.9993	36.0926	2.37242	43.6182	1.6866
						a* other Amino acids changes at this position are known to be pathogenic
						** as determined by real-time PCR
						*** as determined by ssGSEA analysis of next-generation sequencing data
						**** as determined by Sanger sequencing
